# Supplementary material for: Effect of Bombyx mori on the Liver Protection of Non-Alcoholic Fatty Liver Disease Based on In Vitro and In Vivo Models
Source: MDPI journal article supplement (doi:10.3390/cimb43010003), 2021-04-28
Supplement: s1 [file s1]

**Table S1. Metabolites identified in a steam-boiled silkworm powder sample by GC-TOF-MS.**

| No.                                       | Tentative identifications <sup>a</sup> | tR <sup>b</sup> (min:sec) | Unique mass<br>( <i>m/z</i> ) | MS <sup>c</sup> fragment pattern <sup>c</sup> ( <i>m/z</i> ) | TMS <sup>d</sup> | ID <sup>e</sup> |
|-------------------------------------------|----------------------------------------|---------------------------|-------------------------------|--------------------------------------------------------------|------------------|-----------------|
| <b><i>Amino acids</i></b>                 |                                        |                           |                               |                                                              |                  |                 |
| 1                                         | Valine                                 | 06:55.8                   | 144                           | 144, 73, 218, 147, 145, 100, 59, 74, 75, 146                 | 2                | STD MS          |
| 2                                         | Serine                                 | 08:19.3                   | 204                           | 73, 204, 218, 75, 205, 116, 74, 219, 206, 278                | 3                | STD             |
| 3                                         | Threonine                              | 08:34.2                   | 117                           | 73, 218, 117, 219, 101, 147, 57, 75, 74, 291                 | 3                | STD             |
| 4                                         | β-Alanine                              | 08:54.6                   | 174                           | 174, 73, 248, 147, 86, 290, 100, 59, 133, 175, 249           | 3                | MS              |
| 5                                         | Aspartic acid                          | 09:19.9                   | 232                           | 73, 232, 70, 147, 100, 75, 233, 133, 74, 59, 148             | 3                | STD MS          |
| 6                                         | Pyroglutamic acid                      | 09:46.2                   | 156                           | 156, 73, 147, 157, 74, 230, 258, 72, 58, 75, 231             | 2                | MS              |
| 7                                         | Glutamic acid                          | 10:28.7                   | 246                           | 73, 246, 128, 147, 75, 247, 156, 84, 230, 56                 | 3                | MS              |
| 8                                         | Asparagine                             | 10:54.0                   | 116                           | 73, 116, 231, 132, 147, 74, 75, 141, 100, 188                | 3                | STD MS          |
| 9                                         | Lysine                                 | 12:39.7                   | 156                           | 73, 174, 156, 317, 128, 318, 230, 100, 86, 175               | 4                | STD MS          |
| 10                                        | Tyrosine                               | 12:48.1                   | 218                           | 218, 73, 219, 100, 280, 220, 179, 74, 281                    | 3                | STD MS          |
| <b><i>Sugar and Sugar derivatives</i></b> |                                        |                           |                               |                                                              |                  |                 |
| 11                                        | Glyceric acid                          | 08:02.8                   | 189                           | 73, 147, 189, 103, 133, 292, 102, 117, 74, 205               | 3                | MS              |
| 12                                        | Carbohydrate 1                         | 10:59.7                   | 103                           | 73, 103, 147, 217, 205, 307, 117, 74, 133, 173               | –                | MS              |
| 13                                        | Carbohydrate 2                         | 11:29.4                   | 205                           | 73, 147, 205, 217, 117, 74, 148, 133, 394, 206               | –                | MS              |
| 14                                        | Ribonic acid                           | 11:43.7                   | 103                           | 73, 147, 103, 292, 217, 74, 205, 128, 189, 133               | 5                | MS              |
| 15                                        | D-Glucose                              | 12:36.2                   | 205                           | 73, 205, 73, 319, 147, 160, 103, 217, 117, 320               | 5                | STD MS          |
| 16                                        | Carbohydrate 3                         | 12:51.8                   | 319                           | 73, 147, 319, 205, 217, 74, 103, 117, 129, 204, 148          | –                | MS              |
| 17                                        | myo-Inositol                           | 13:51.5                   | 217                           | 73, 217, 147, 305, 191, 318, 306, 204, 218, 129, 319         | 6                | STD MS          |
| 18                                        | Carbohydrate 4                         | 14:05.3                   | 319                           | 73, 319, 147, 205, 103, 74, 320, 133, 217, 117               | –                | MS              |
| 19                                        | Glyceryl-glycoside                     | 15:06.8                   | 204                           | 204, 73, 147, 217, 103, 205, 129, 206, 337                   | 6                | MS              |
| <b><i>Fatty acids</i></b>                 |                                        |                           |                               |                                                              |                  |                 |
| 20                                        | Stearic acid                           | 14:32.9                   | 117                           | 117, 73, 75, 132, 129, 341, 145, 55, 342                     | 1                | STD MS          |
| 21                                        | Oleamide                               | 15:32.8                   | 131                           | 75, 131, 144, 73, 116, 128, 55, 338, 69, 353, 115, 145       | 1                | MS              |
| <b><i>Etc.</i></b>                        |                                        |                           |                               |                                                              |                  |                 |
| 22                                        | Butanediol                             | 04:55.6                   | 117                           | 117, 73, 147, 75, 118, 74, 133, 66, 148, 119                 | 2                | MS              |

|    |                                  |         |     |                                                     |   |        |
|----|----------------------------------|---------|-----|-----------------------------------------------------|---|--------|
| 23 | Hydroxylamine                    | 05:52.1 | 133 | 73. 133. 146. 119. 59. 147. 249. 130                | 3 | MS     |
| 24 | Pyruvic acid                     | 06:08.9 | 133 | 73, 147, 133, 59, 100, 72, 148, 220, 74, 86, 235    | 2 | MS     |
| 25 | Urea                             | 07:06.8 | 189 | 147, 73, 189, 171, 99, 148, 75, 14, 131, 59         | 2 | MS     |
| 26 | Hydroxybenzoic acid              | 10:32.7 | 267 | 267, 223, 193, 282, 268, 126, 269, 224, 194, 283    | 2 | STD MS |
| 27 | $\alpha$ -Glycerophosphoric acid | 11:35.5 | 299 | 73, 299, 357, 147, 101, 103, 133, 211, 129          | 4 | MS     |
| 28 | 1-Deoxynojirimycin               | 12:09.0 | 420 | 420, 216, 147, 421, 217, 422, 129, 133, 218         | – | STD    |
| 29 | Pantothenic acid                 | 13:09.6 | 291 | 75, 291, 157, 117, 201, 247, 159, 129, 55, 144, 420 | 3 | MS     |
| 30 | Phytol                           | 14:09.9 | 143 | 143, 73, 75, 144, 123, 57, 55, 81, 69, 103          | 1 | MS     |

***Non-Identifications***

|    |         |         |     |                                                            |   |   |
|----|---------|---------|-----|------------------------------------------------------------|---|---|
| 31 | N.I. 1  | 04:06.4 | 171 | 171, 73, 172, 78, 173, 64, 151, 186, 100                   | – | – |
| 32 | N.I. 2  | 04:34.0 | 89  | 73, 89, 59, 161, 74, 90, 60, 58, 75, 91                    | – | – |
| 33 | N.I. 3  | 05:02.0 | 123 | 123, 93, 55, 125, 95, 103, 59, 124                         | – | – |
| 34 | N.I. 4  | 06:17.2 | 86  | 86, 75, 73, 87, 74, 188, 146, 103, 70, 61, 170, 76         | – | – |
| 35 | N.I. 5  | 06:31.0 | 86  | 86, 75, 73, 69, 87, 74, 146, 57, 56, 188, 103              | – | – |
| 36 | N.I. 6  | 08:15.4 | 57  | 57, 73, 97, 127, 215, 111, 54, 109, 69,, 216, 246, 159     | – | – |
| 37 | N.I. 7  | 09:33.0 | 84  | 84, 75, 158, 157, 186, 73, 85, 56, 116, 103                | – | – |
| 38 | N.I. 8  | 09:40.2 | 131 | 73, 131, 147, 75, 306, 74, 133, 130, 132, 259              | – | – |
| 39 | N.I. 9  | 09:55.7 | 205 | 205, 292, 147, 220, 217, 102, 232, 293, 221, 142, 206, 149 | – | – |
| 40 | N.I. 10 | 10:03.4 | 117 | 73, 147, 292, 117, 205, 217, 103, 74, 220, 133             | – | – |
| 41 | N.I. 11 | 10:07.3 | 129 | 73, 129, 147, 247, 75, 203, 157, 85, 149, 133, 349         | – | – |
| 42 | N.I. 12 | 10:15.7 | 245 | 73, 147, 245, 75, 74, 83, 148, 133, 149                    | – | – |
| 43 | N.I. 15 | 10:56.9 | 129 | 73, 147, 75, 129, 74, 149, 133, 109, 247, 148, 363         | – | – |
| 44 | N.I. 16 | 11:02.9 | 260 | 73, 144, 260, 147, 170, 129, 116, 75, 128, 145, 261        | – | – |

<sup>a</sup> Tentative metabolites based on variable important projection (VIP) analysis with a cutoff value of 0.7 and  $p$ -value < 0.05. <sup>b</sup> Retention time; <sup>c</sup> MS fragment patterns detected

<sup>d</sup> Trimethylsilyl; <sup>e</sup> Identification: STD, Standard

**Table S2. Metabolites identified in a steam-boiled silkworm powder sample by UHPLC-LTQ-Orbitrap-MS.**

| No.                                | tR <sup>a</sup> (min) | Metabolites <sup>b</sup>           | [M-H] <sup>-</sup> | M.W. <sup>c</sup> | MS <sup>d</sup> Fragments pattern (m/z) | Molecular Formula | Δ ppm | REF <sup>e</sup> |
|------------------------------------|-----------------------|------------------------------------|--------------------|-------------------|-----------------------------------------|-------------------|-------|------------------|
| <i><b>Carboxylic acids</b></i>     |                       |                                    |                    |                   |                                         |                   |       |                  |
| 1                                  | 0.92                  | Malic acid                         | 133.0150           | 134               | 115,87>71                               | C4H6O5            | 5.289 | (1)              |
| 2                                  | 1.05                  | Citric acid                        | 191.0202           | 192               | 111>66                                  | C6H8O7            | 2.639 | (2), LIB         |
| <i><b>Hydroxybenzoic acids</b></i> |                       |                                    |                    |                   |                                         |                   |       |                  |
| 3                                  | 1.36                  | Pantothenic acid                   | 218.1041           | 219               | 146>88>59                               | C9H17NO5          | 3.412 | (3), LIB         |
| 4                                  | 1.44                  | Gentisoyl hexoside                 | 315.0726           | 316               | 153>109                                 | C13H16O9          | 1.507 | (2, 4)           |
| <i><b>Phenolic acids</b></i>       |                       |                                    |                    |                   |                                         |                   |       |                  |
| 5                                  | 0.84                  | Quinic acid                        | 191.0568           | 192               | 173,127,111,85,170>113,143              | C7H12O6           | 3.343 | (1)              |
| 6                                  | 3.65                  | <i>p</i> -Coumaric acid            | 163.0408           | 164               | 119                                     | C9H8O3            | 4.248 | (2, 5)           |
| 7                                  | 3.87                  | Caffeoylquinic acid                | 353.0883           | 354               | 191,173>126,85                          | C16H18O9          | 1.288 | (5), LIB         |
| 8                                  | 4.44                  | Coumaroylquinic acid               | 337.0936           | 338               | 191,163>172,126,85                      | C16H18O8          | 2.193 | (2), LIB         |
| <i><b>Flavonols</b></i>            |                       |                                    |                    |                   |                                         |                   |       |                  |
| 9                                  | 4.01                  | Quercetin-hexosyl hexoside         | 625.1419           | 626               | 463,301>300,445>178,150,273,270         | C27H30O17         | 1.420 | (2, 5), LIB      |
| 10                                 | 4.03                  | Quercetin-rhamnosyl dihexoside     | 771.1993           | 772               | 609,300>301>270,178,150,255             | C33H40O21         | 0.530 | (6)              |
| 11                                 | 4.23                  | Kaempferol-rutinoside-hexoside     | 755.2051           | 756               | 593>285>257                             | C33H40O20         | 1.488 | (1, 2)           |
| 12                                 | 4.58                  | Quercetin-rhamnose-hexose-rhamnose | 755.2044           | 756               | 300>271,255>243,227                     | C33H40O20         | 0.442 | (1)              |
| 13                                 | 4.72                  | Kaempferol O-rhamnosyl rutinoside  | 739.2111           | 740               | 575,284,255>339,393,429,309,547>311     | C33H40O19         | 2.730 | (7)              |
| 14                                 | 4.84                  | Rutin                              | 609.1480           | 610               | 301>271,255>243,227                     | C27H30O16         | 3.123 | (1, 5), LIB      |
| 15                                 | 4.96                  | Isoquercitrin                      | 463.0892           | 464               | 301>178,150,271,255>150                 | C21H20O12         | 2.161 | (5)              |
| 16                                 | 5.03                  | Kaempferol-rhamnosyl hexoside      | 593.1517           | 594               | 285,284>255,277,211                     | C27H30O15         | 0.905 | (2, 5)           |
| 17                                 | 5.10                  | Quercetin-malonyl hexoside         | 549.0892           | 550               | 505>301,463>271,178,150,255             | C24H22O15         | 1.160 | (1)              |
| 18                                 | 5.19                  | Kaempferol-hexoside                | 447.0945           | 448               | 285>255>227                             | C21H20O11         | 2.674 | (5), LIB         |

***Lysophospholipids***

|    |       |               |          |     |                  |            |       |        |
|----|-------|---------------|----------|-----|------------------|------------|-------|--------|
| 19 | 8.22  | LysoPC (18:3) | 562.3160 | 517 | 502, 277>233,259 | C26H48O7NP | 1.669 | (8)    |
| 20 | 8.46  | LysoPE(18:2)  | 476.2795 | 477 | 279>261>243, 233 | C23H44NO7P | 2.619 | (8)    |
| 21 | 8.65  | LysoPC (18:2) | 564.3313 | 519 | 504>279>261      | C26H50NO7P | 1.078 | (8, 9) |
| 22 | 8.76  | LysoPE (16:0) | 452.2792 | 453 | 255>237          | C21H44NO7P | 2.007 | (8)    |
| 23 | 9.00  | LysoPC (16:0) | 540.3313 | 495 | 480>255>237      | C24H50NO7P | 1.126 | (8)    |
| 24 | 10.07 | LysoPC (18:0) | 568.3629 | 523 | 508>283>265      | C26H54NO7P | 2.372 | (7)    |

***Etc.***

|    |      |                     |          |     |                               |           |        |        |
|----|------|---------------------|----------|-----|-------------------------------|-----------|--------|--------|
| 25 | 0.82 | Maltose             | 341.1105 | 342 | 179,161>160,142,88            | C12H22O11 | 4.501  | (3)    |
| 26 | 1.95 | Protocatechuic acid | 153.0203 | 154 | 108>81                        | C7H6O4    | -0.013 | (5, 6) |
| 27 | 6.63 | 9,12,13-TriHOME     | 329.2343 | 330 | 229, 311,171>211,292>183, 274 | C18H34O5  | 2.742  | (7)    |

<sup>a</sup> Retention time. <sup>b</sup> Tentative metabolites based on variable important projection (VIP) analysis with a cutoff value of 0.7 and *p*-value < 0.05. <sup>c</sup> Molecular weight <sup>d</sup> MS<sup>n</sup> fragment patterns detected in the negative ion mode. <sup>e</sup> Reference LIB, in house Library <sup>f</sup> Lysophosphatidylcholine <sup>g</sup> lysophosphatidylethanolamine

**Table S3. The primer sets used for real-time PCR in this study.**

|             | Gene           | Forward (5' – 3')      | Reverse (5' – 3')     |
|-------------|----------------|------------------------|-----------------------|
| HepG2       | PPAR $\gamma$  | TGCAGGTGATCAAGAAGACG   | AGTGCAACTGGAAGAAGGGA  |
|             | C/EBP $\alpha$ | TGGACAAGAACAGCAACGAGTA | ATTGTCACTGGTCAGCTCCAG |
|             | SREBP-1c       | GCGCCTTGACAGGTGAAGTC   | GCCAGGGAAGTCACTGTCTTG |
|             | FAS            | CCCCTGATGAAGAAGGATCA   | ACTCCACAGGTGGGAACAAG  |
|             | PPAR $\alpha$  | ACGATTCGACTCAAGCTGGT   | GTTGTGTGACATCCCGACAG  |
|             | CPT-1          | CCTCCGTAGCTGACTCGGTA   | GGAGTGACCGTGAACTGAAA  |
|             | $\beta$ -actin | CTCTTCCAGCCTTCCTTCCT   | AGCACTGTGTTGGCGTACAG  |
| Mouse Liver | PPAR $\gamma$  | CAGGAGAGCAGGGATTTGCA   | CCTACGCTCAGCCCTCTTCAT |
|             | C/EBP $\alpha$ | TTACAACAGGCCAGGTTTCC   | GGCTGGCGACATACAGTACA  |
|             | SREBP-1c       | ATCGCAAACAAGCTGACCTG   | AGATCCAGGTTTGAGGTGGG  |
|             | FAS            | TTGCTGGCACTACAGAATGC   | AACAGCCTCAGAGCGACAAT  |
|             | PPAR $\alpha$  | CAGGAGAGCAGGGATTTGCA   | CCTACGCTCAGCCCTCTTCAT |
|             | CPT-1          | CTCAGTGGGAGCGACTCTTCA  | GGCCTCTGTGGTACACGACAA |
|             | $\beta$ -actin | CTGTCCCTGTATGCCTCTG    | ATGTCACGCACGATTTC     |

PPAR $\gamma$ , peroxisome proliferator-activated receptor gamma; C/EBP $\alpha$ , CCAAT/enhancer-binding protein alpha; SREBP-1c, sterol regulatory element-binding protein1-c; FAS, fatty acid synthase; CPT-1, carnitine palmitoyltransferase-1; PPAR $\alpha$ , Peroxisome proliferator-activated receptor alpha

**A**

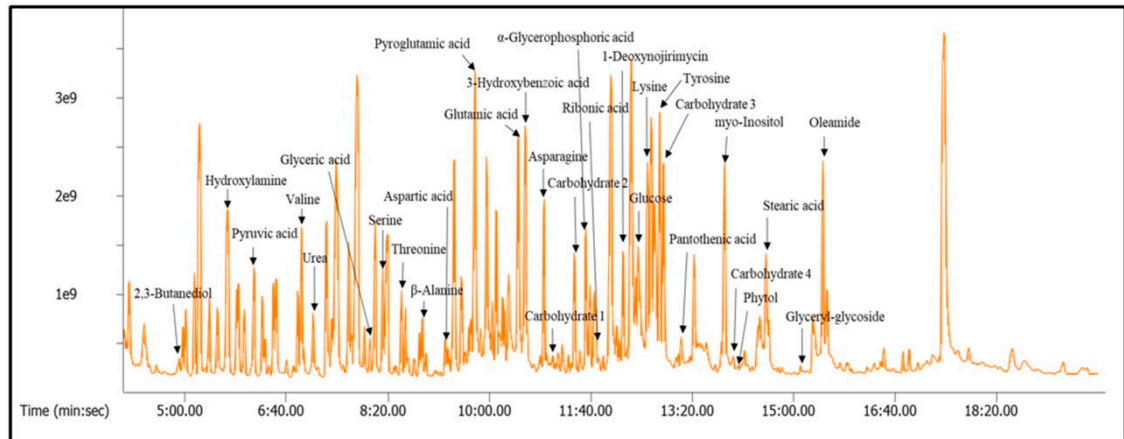

**B**

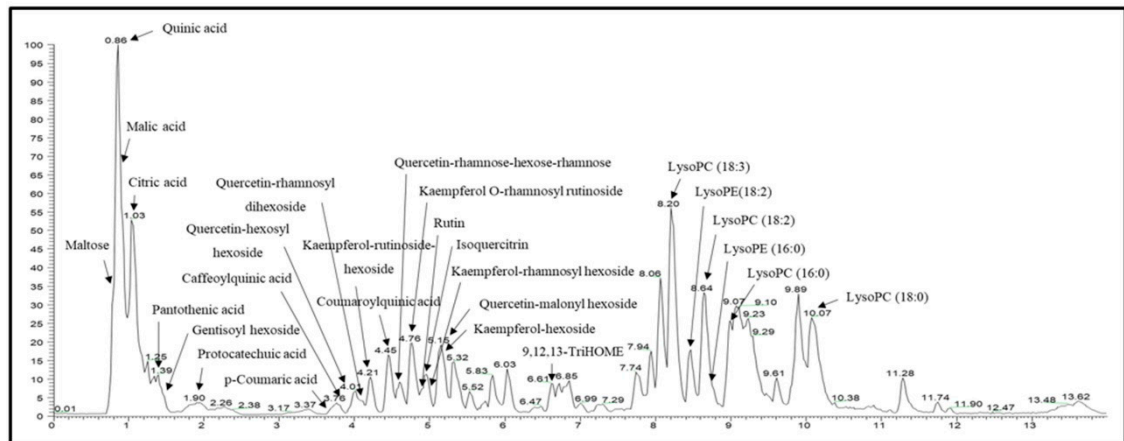

**Figure S1.** Metabolomic profiling of steam-boiled SW powder samples using GC-TOF-MS (A) and UHPLC-LTQ-Orbitrap-MS/MS (B).

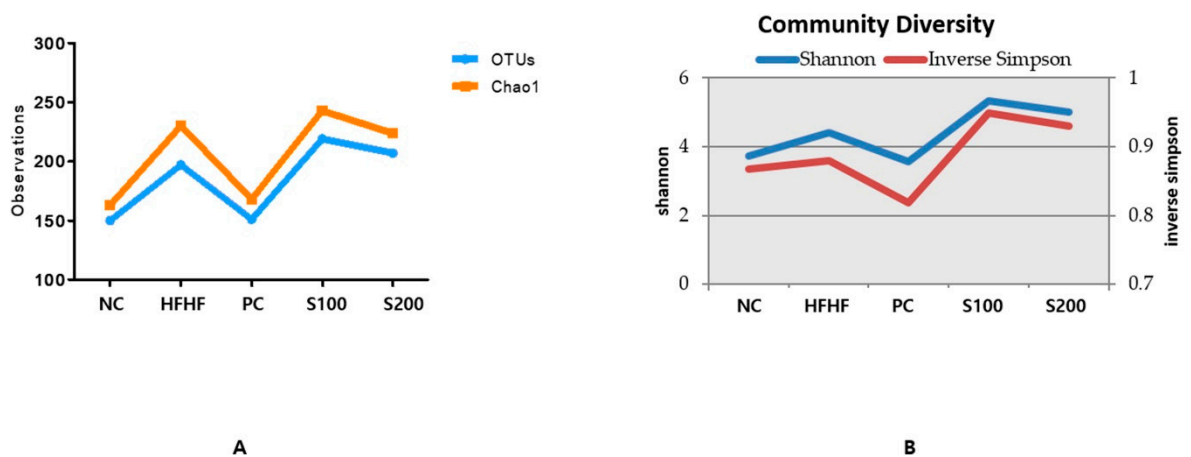

**Figure S2.** Responses of the diversity and richness of the gut microbiota to *Bombyx mori* (SW) during the treatment of obesity in mice. (a) Operational taxonomic units (OUTs) and Chao1 number of gut microbiota in five groups. (b) Shannon curves and inverse simpson curves of gut microbiota for each group, respectively.

## References

1. Sánchez-Salcedo EM, Tassotti M, Del Rio D, Hernández F, Martínez JJ, Mena P. (Poly)phenolic fingerprint and chemometric analysis of white (*Morus alba* L.) and black (*Morus nigra* L.) mulberry leaves by using a non-targeted UHPLC–MS approach. *Food Chemistry*. 2016 2016/12/01/;212:250-5.
2. Mena P, Sánchez-Salcedo EM, Tassotti M, Martínez J, Hernández F, Rio D. Phytochemical evaluation of eight white (*Morus alba* L.) and black (*Morus nigra* L.) mulberry clones grown in Spain based on UHPLC-ESI-MSn metabolomic profiles. *Food Research International*. 2016;89:1116-22.
3. Yang J, Wen H, Zhang L, Zhang X, Fu Z, Li J. The influence of ripening stage and region on the chemical compounds in mulberry fruits (*Morus atropurpurea* Roxb.) based on UPLC-QTOF-MS. *Food Research International*. 2017 2017/10/01/;100:159-65.
4. Cao X, Yang L, Xue Q, Yao F, Sun J, Yang F, Liu Y. Antioxidant evaluation-guided chemical profiling and structure-activity analysis of leaf extracts from five trees in *Broussonetia* and *Morus* (*Moraceae*). *Scientific Reports*. 2020 2020/03/16;10:4808.
5. Natić MM, Dabić D, Papetti A, Fotirić Akšić MM, Ognjanov V, Ljubojević M, Tešić Ž. Analysis and characterisation of phytochemicals in mulberry (*Morus alba* L.) fruits grown in Vojvodina, North Serbia. *Food Chem*. 2015 Mar 15;171:128-36.
6. Jin Q, Yang J, Ma L, Wen D, Chen F, Li J. Identification of polyphenols in mulberry (genus *Morus*) cultivars by liquid chromatography with time-of-flight mass spectrometer. *Journal of Food Composition and Analysis*. 2017 2017/10/01/;63:55-64.
7. Son SY, Lee S, Singh D, Lee NR, Lee DY, Lee CH. Comprehensive Secondary Metabolite Profiling Toward Delineating the Solid and Submerged-State Fermentation of *Aspergillus oryzae* KCCM 12698. *Frontiers in microbiology*. 2018;9:1076.
8. Lee DE, Lee S, Singh D, Jang ES, Shin HW, Moon BS, Lee CH. Time-resolved comparative metabolomes for Koji fermentation with brown-, white-, and giant embryo-rice. *Food Chem*. 2017 Sep 15;231:258-66.
9. Shin GR, Lee S, Lee S, Do S-G, Shin E, Lee CH. Maturity stage-specific metabolite profiling of *Cudrania tricuspidata* and its correlation with antioxidant activity. *Industrial Crops and Products*. 2015 2015/08/01/;70:322-31.
